# Supplementary material
Source: PubMed Central journal article supplement (PMC6349095)
Supplement: supp_RA118.003904_138052_1_supp_237195_p5gcf5.pdf [file supp_RA118.003904_138052_1_supp_237195_p5gcf5.pdf]

Supporting Information for : A biosensor-based approach reveals links between efflux pump expression and cell cycle regulation in pleiotropic drug resistance of yeast

**Jian Li, Kristen Kolberg, Ulrich Schlecht, Robert P. St.Onge, Ana Maria Aparicio, Joe Horecka, Ronald W. Davis, Maureen E. Hillenmeyer, Colin J.B. Harvey\***

From the Stanford Genome Technology Center, Department of Biochemistry, Stanford University School of Medicine, Palo Alto, CA 94304

## Table of Contents

|                                                                                                                                          |    |
|------------------------------------------------------------------------------------------------------------------------------------------|----|
| Supplementary Figures: .....                                                                                                             | 2  |
| Figure S1: Does dependent response of strains JLY31-33 to 3-AT in the presence of compounds 1-3. ....                                    | 2  |
| Figure S2: Similarity in structure of microsource natural products does not correlate with similarities in transporter activations. .... | 3  |
| Figure S3. A diverse group of chemicals that show enhanced mad deletion resistance when transporters are present. ....                   | 4  |
| Supplementary Tables.....                                                                                                                | 5  |
| Table S1: Sequences of promoters used in this study .....                                                                                | 5  |
| Table S2: GO Enrichment analysis of screen hits.....                                                                                     | 6  |
| Table S3: qPCR validation of PDR transcriptional regulators .....                                                                        | 8  |
| Table S4: qPCR on <i>madΔ</i> strains.....                                                                                               | 9  |
| Table S5: Description of all genes tested in qPCR experiments.....                                                                       | 10 |
| Table S6: Plasmids used in this study .....                                                                                              | 15 |
| Table S7: Strains used in this study .....                                                                                               | 16 |
| Dataset.....                                                                                                                             | 17 |
| Dataset 1. Z-scores for each drug under with each biosensor construct in MSNP collection. ..                                             | 17 |
| Dataset 2. Identity, fold change and significance of all samples that pass significance threshold in screenings.....                     | 17 |
| Reference .....                                                                                                                          | 18 |

Supplementary Figures:

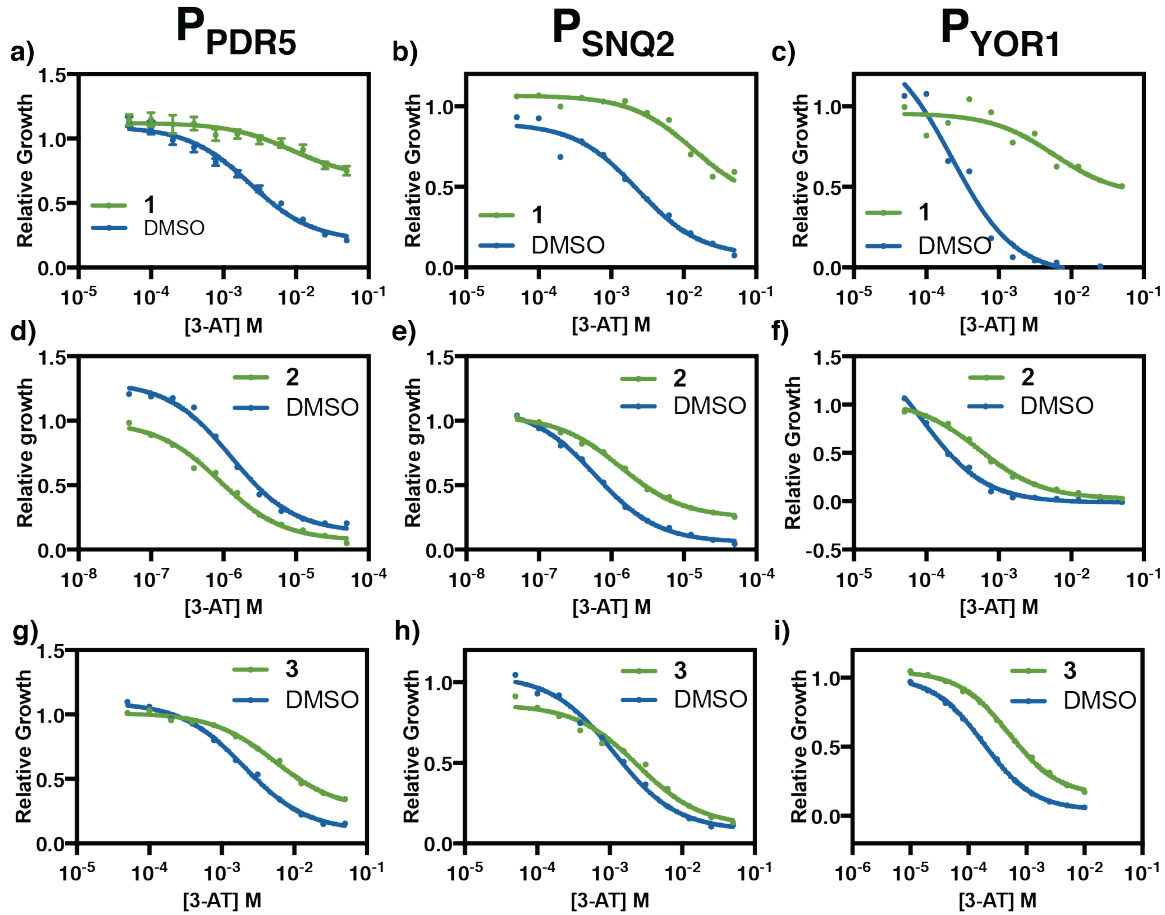

**Figure S1: Does dependent response of strains JLY31-33 to 3-AT in the presence of compounds 1-3.** All strains were grown in YNB media with 10  $\mu$ M drug or an equivalent amount of DMSO. Line represents best fit dose-response curve, and error bars represent SD (n=4). **a)** JLY31 treated with **1** (reused from Figure 1c and included here for context). **b)** JLY32 treated with **1**. **c)** JLY33 treated with **1**. **d)** JLY31 treated with **2**. **e)** JLY32 treated with **2**. **f)** JLY33 treated with **2**. **g)** JLY31 treated with **3**. **h)** JLY32 treated with **3**. **i)** JLY33 treated with **3**.

**A**

jaccard distance  
between pairs of  
structures

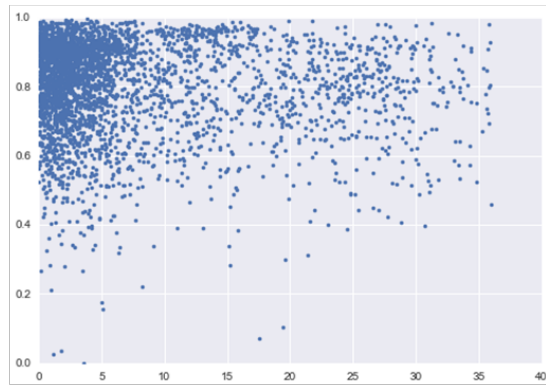

euclidean distance between pairs of  
expression Z-scores

**B**

jaccard distance  
between pairs of  
structures

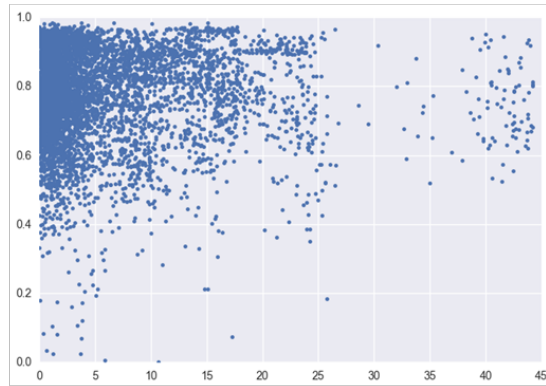

euclidean distance between pairs of  
expression Z-scores

**C**

jaccard distance  
between pairs of  
structures

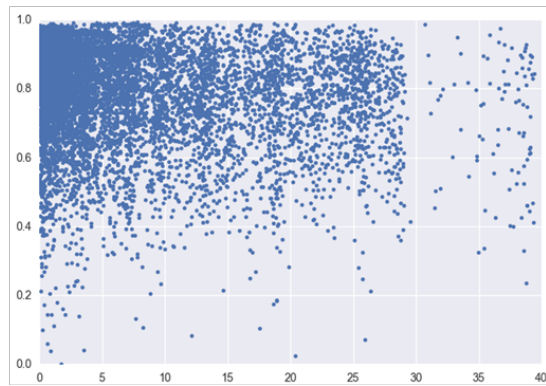

euclidean distance between pairs of  
expression Z-scores

**Figure S2: Similarity in structure of microsource natural products does not correlate with similarities in transporter activations.** For drugs that had a Z-score  $>3$  for each promoter, jaccard distance were calculated between pairs of the structures, and euclidean distance were calculated between the difference in Z-scores. **a)** JLY31 induction. **b)** JLY32 induction. **c)** JLY33 induction.



Supplementary Tables

Table S1: Sequences of the promoters used in this study

| Promoter          | Sequence                                                                                                                                                                                                                                                                                                                                                                                                                                                                                                                                                                                                                                                                                                                                                                                                                                                                                                                                                                                                                                                                                            |
|-------------------|-----------------------------------------------------------------------------------------------------------------------------------------------------------------------------------------------------------------------------------------------------------------------------------------------------------------------------------------------------------------------------------------------------------------------------------------------------------------------------------------------------------------------------------------------------------------------------------------------------------------------------------------------------------------------------------------------------------------------------------------------------------------------------------------------------------------------------------------------------------------------------------------------------------------------------------------------------------------------------------------------------------------------------------------------------------------------------------------------------|
| P <sub>PDR5</sub> | CGTTAACGTAAATATGCTTCCTCTTTGATTCCAACAATGATATTATAAGGAAATTATCGTGCACA<br>ATCTAATCAACAAGGACAAAAGAAAAGAAAAGTTGAGAGAGAGAACAAAAGTTCAAATCAAAG<br>AAAAAAAAAGAACATCAAATTACCTATTACAATAAACAAATTAAGCCATACTCGCAACAATTGCC<br>ATAATAGAAAAGCAGCACCTCGTTGGCGCAGTCCCTTACATAGTACACAACATTTATCACTTCAC<br>ACAATCAGGAGTGGAACCTCAATGGAAAACAACACCACACGTATGATCTTACTAATAAAAAGAACA<br>TGAACGTTCTCAGCGCGAACGTTTCGATTCTGCGCCTTCGAGCACAGGATAAGTTGCAGGAAG<br>CCATCACATCTATGCAACGATTATCACGACACAACCTTGCCGCCGAGAAAACGTCCGTGGAGAA<br>CCATTCGGTTCGATTGCTTCCCACGGAACGAGTGGACTGAAACTTAAGACTGCCCTCTCTTTCC<br>GCGGAATCGCTCATGCCGCGGTGCCACAACATTTTCAGATTTACTAAGACTCCGGTGTAGTGTGG<br>GCTCACCCGCGGGTCGTGATCACGATTCAGCACCCCTTTGGACTCGTGATTCCTGGAAAAGGTCA<br>GATCTGTATTCTACTTATGGTAATGTGCTAAAAAAGAGAAATGTCTCCGCGGAACCTTCTAC<br>GCCGTGGTACGATATCTGTTGAACGTAATCTGAGCAATACAACAAGGCCTCTCCTATACATAT<br>ATAATTGTGATGTGCATAACCTTATGGCTGTTCGCTTTTATTATCATACCTTAGAATGAAATCCAA<br>AAGAAAAAGTCACGCAAAGTTGCAAAACATAACAACCTGTGTTAGTTATCACTCGACTTTGTTA<br>TTCTAATTATAAATAAATTGGCAACTAGGAACTTCGAAAAAGAAAATAAAGACCCCTTTAAGTT<br>TTCGTATCCGCTCGTTCGAAAGACTTTAGACAAAA |
| P <sub>SNQ2</sub> | GATCTCACAGATGAAGAACTAAAAGACGCAATTATAGTTTCGAAGCCTGCCTTGGGTACTTGTTT<br>GTACGAACAATAACACTAAACACCTTCTTGAACAACCTTTAAATATTTAAAGTTTACTCATAACC<br>TCTTACACTCTATAAAGAAACAAGTTGGTGAGTCCAATAGAACCCATTCCAGCATCCGATGCAA<br>CCATAGCCCGTTGATGCGAGTCAGAGTGGTCCGCGCACAGAGGTTATGTGACCATGGTAACC<br>GTACACATTTTTCCACGGCAAGGAAGTGGCGCGAAAGAGCACCCGCCCTCCACGGATCACCCC<br>ATTTGGAAGAAGACGGAGACATAAAAAAATTACCTTCACGCCAGACTATGTATGACTCGTAG<br>AAATCTAGCATCCGCGGAGCTATTTAAGTTTCCGCGGATGCCTTTCGATCCTTTCCAGTCGTC<br>TGGTTCGCGCACATATGACTAAATGTCCGCCATTTCCGTTTAAATCCGTTTCTATTTCTTTA<br>GGTCTTTCCATTGTATTCCTGCAACCCCGTGGGTATTGGTATTACTAATAGTACTACGCAAC<br>ATCAACATATAAAAACAATGATGAGTAGTGGCTCCCTCCCTCACCGCTATCGCCTCACCACTTTT<br>ATGCTTGTATATGCTTGTAGATAAATAATACCTAACGAAAACAATATATACGAACCTAGTGTAT<br>TTGTATCTTTTGTTTTTCAAGTTGAAAGTGTGCGAGGTCAAAAAAAAAAAGCTCACTGTAGGAT<br>ATAGGAGTTACTATATCACCAAGTGCATTACATTCTCAGTGCATCCATCGTCTTCAACATTGATTA<br>TTTTCTCCTTCCATTGATTAGAGTTCAAGCTCCCTGAGAAAACGAAGGTATAGCGGACGTACCCG<br>CAGAGACATAAAAAAAGAAAACTATATCGAAGACCGAAAAGCAGTAAAAAAGTGGATAGAATA<br>ACACAGCTACCAAAATACGTAAAGAGAATTCA             |
| P <sub>YOR1</sub> | TTCTTTTCTTTTTTTTTTTTCTTTGACTGTTACCCGGTTGTTTATATTTGTAGGAAAACAACAAC<br>GACAGAGAAAAATATCCTTGCAGTGGCGGCTAATTTGTTAGTTGACTGATTGATCACCTTCACTTA<br>TTAAAGTAAAATCAGCATAACAAGAGATCAGAAGGGAGAAAGAGAGTGGGCAAGGCTATAGTACT<br>TTGAAGAAAGCATCTTTGAACCGACCAGTTCTCTTCAAGCAAAATCTATATGACTAACCAGCA<br>AGGGCAAAAGGGTGTGAGAGGGCCCGTCTTCTCCCGCTATAGCCGTCACTGGTATCCCTCCT<br>GGCTGCACAAATCCGATAGAAAAGGGGAAGAAGGAAGTTTAGTGCCACCTTATAGCACGCAGTTA<br>CTGTTTACGCTAAGGAGAGGCATACTCAATTTTTATTAGTCGCCTTCTTATGTTGCTGCGTTTTTA<br>TCCACGGTTCTCTACTAAATGCTTGCATAAGCGCTTCTATTTTCTCCCCACCGCGAGGCGGAA<br>ATGGCACATTTTTTTTCTTTTGTCTCTGTGCTTTTGTGTAATTTTTGGCATGTGCTATTGTATGAA<br>GATAACCGTGGTTCCGTGGAATAGCCGGAATTTTGGCGGGAATATGACGGACATGATTTAA<br>CACCCGTGGAATGAAAAAGCCAAGGTAAGAAAGTGGCAATATTTTTCTACAATAGATCTG<br>CTGTCCCTTAAATGATTACCATACATATATATTTATTACACATCTGTCAGAGGTAGCTAGCGA<br>AGGTGTCACTGAAATATTTTTGTTCCAGTTAGTATAAATACGGAGGTAGAACAGCTCTCCGCGT<br>GTATATCTTTTTTGCCTATACAAGAACAGGAAGAACGCATTTCCATACCTTTTTCTCCTTACA<br>GGTGCCCTCTGAGTAGTGTACGAACGAGGAAAAAGATTAATATTACTGTTTTTATATTTAAAAA<br>GAGTAAAGCCGTTGCTATATACGAAT                  |

**Table S2: GO Enrichment analysis of screen hits**

| <b>Treatment Condition</b> | <b>GO Term</b>                                   | <b>Description</b>                                                                              | <b>P-value</b> |
|----------------------------|--------------------------------------------------|-------------------------------------------------------------------------------------------------|----------------|
| <b>3</b>                   | GO:0048583                                       | regulation of response to stimulus                                                              | 1.33E-04       |
|                            | GO:0010646                                       | regulation of cell communication                                                                | 3.38E-04       |
|                            | GO:0042147                                       | retrograde transport, endosome to Golgi                                                         | 3.45E-04       |
|                            | GO:0010647                                       | positive regulation of cell communication                                                       | 4.67E-04       |
| <b>2</b>                   | GO:0010468                                       | regulation of gene expression                                                                   | 4.00E-05       |
|                            | GO:0044774                                       | mitotic DNA integrity checkpoint                                                                | 6.25E-05       |
|                            | GO:0031326                                       | regulation of cellular biosynthetic process                                                     | 1.28E-04       |
|                            | GO:0009889                                       | regulation of biosynthetic process                                                              | 1.31E-04       |
|                            | GO:0031570                                       | DNA integrity checkpoint                                                                        | 1.35E-04       |
|                            | GO:2000112                                       | regulation of cellular macromolecule biosynthetic process                                       | 1.67E-04       |
|                            | GO:0010556                                       | regulation of macromolecule biosynthetic process                                                | 1.97E-04       |
|                            | GO:0050789                                       | regulation of biological process                                                                | 2.09E-04       |
|                            | GO:0019354                                       | siroheme biosynthetic process                                                                   | 2.74E-04       |
|                            | GO:0046156                                       | siroheme metabolic process                                                                      | 2.74E-04       |
|                            | GO:0050794                                       | regulation of cellular process                                                                  | 2.81E-04       |
|                            | GO:1901991                                       | negative regulation of mitotic cell cycle phase transition                                      | 2.81E-04       |
|                            | GO:0065007                                       | biological regulation                                                                           | 3.00E-04       |
|                            | GO:1901988                                       | negative regulation of cell cycle phase transition                                              | 3.65E-04       |
|                            | GO:0051171                                       | regulation of nitrogen compound metabolic process                                               | 4.37E-04       |
|                            | GO:0000075                                       | cell cycle checkpoint                                                                           | 6.59E-04       |
| GO:0000103                 | sulfate assimilation                             | 6.65E-04                                                                                        |                |
| GO:0007093                 | mitotic cell cycle checkpoint                    | 7.31E-04                                                                                        |                |
| GO:2000765                 | regulation of cytoplasmic translation            | 8.12E-04                                                                                        |                |
| <b>1</b>                   | GO:0061188                                       | negative regulation of chromatin silencing at rDNA                                              | 3.82E-06       |
|                            | GO:0061187                                       | regulation of chromatin silencing at rDNA                                                       | 7.53E-06       |
|                            | GO:0061186                                       | negative regulation of chromatin silencing at silent mating-type cassette                       | 2.19E-05       |
|                            | GO:0090054                                       | regulation of chromatin silencing at silent mating-type cassette                                | 5.03E-05       |
|                            | GO:0031939                                       | negative regulation of chromatin silencing at telomere                                          | 7.16E-05       |
|                            | GO:0031938                                       | regulation of chromatin silencing at telomere                                                   | 2.85E-04       |
|                            | GO:2000217                                       | regulation of invasive growth in response to glucose limitation                                 | 3.56E-04       |
|                            | GO:0031936                                       | negative regulation of chromatin silencing                                                      | 3.56E-04       |
|                            | GO:0045815                                       | positive regulation of gene expression, epigenetic                                              | 4.39E-04       |
|                            | GO:0060969                                       | negative regulation of gene silencing                                                           | 5.35E-04       |
|                            | GO:0061408                                       | positive regulation of transcription from RNA polymerase II promoter in response to heat stress | 6.89E-04       |
|                            | GO:0010646                                       | regulation of cell communication                                                                | 9.28E-04       |
|                            | GO:2000219                                       | positive regulation of invasive growth in response to glucose limitation                        | 9.35E-04       |
| <b>Overall</b>             | GO:0065007                                       | biological regulation                                                                           | 7.36E-07       |
|                            | GO:0050794                                       | regulation of cellular process                                                                  | 1.10E-06       |
|                            | GO:0050789                                       | regulation of biological process                                                                | 2.09E-06       |
|                            | GO:0031326                                       | regulation of cellular biosynthetic process                                                     | 2.42E-06       |
|                            | GO:0009889                                       | regulation of biosynthetic process                                                              | 2.54E-06       |
|                            | GO:0080135                                       | regulation of cellular response to stress                                                       | 2.72E-06       |
| GO:0010556                 | regulation of macromolecule biosynthetic process | 3.36E-06                                                                                        |                |

|            |                                                                           |          |
|------------|---------------------------------------------------------------------------|----------|
| GO:0080134 | regulation of response to stress                                          | 3.57E-06 |
| GO:0010468 | regulation of gene expression                                             | 6.25E-06 |
| GO:2000112 | regulation of cellular macromolecule biosynthetic process                 | 1.17E-05 |
| GO:0048583 | regulation of response to stimulus                                        | 1.37E-05 |
| GO:0051171 | regulation of nitrogen compound metabolic process                         | 1.75E-05 |
| GO:0080090 | regulation of primary metabolic process                                   | 3.56E-05 |
| GO:0060255 | regulation of macromolecule metabolic process                             | 4.06E-05 |
| GO:0019222 | regulation of metabolic process                                           | 4.43E-05 |
| GO:0031323 | regulation of cellular metabolic process                                  | 4.87E-05 |
| GO:0010646 | regulation of cell communication                                          | 5.85E-05 |
| GO:0016569 | covalent chromatin modification                                           | 5.99E-05 |
| GO:0006357 | regulation of transcription from RNA polymerase II promoter               | 8.41E-05 |
| GO:0010647 | positive regulation of cell communication                                 | 1.24E-04 |
| GO:0048522 | positive regulation of cellular process                                   | 1.41E-04 |
| GO:0061188 | negative regulation of chromatin silencing at rDNA                        | 1.63E-04 |
| GO:0048523 | negative regulation of cellular process                                   | 1.63E-04 |
| GO:0006355 | regulation of transcription, DNA-templated                                | 1.83E-04 |
| GO:2001141 | regulation of RNA biosynthetic process                                    | 1.83E-04 |
| GO:1903506 | regulation of nucleic acid-templated transcription                        | 1.83E-04 |
| GO:0031936 | negative regulation of chromatin silencing                                | 1.86E-04 |
| GO:0048518 | positive regulation of biological process                                 | 2.08E-04 |
| GO:0048519 | negative regulation of biological process                                 | 2.19E-04 |
| GO:0031939 | negative regulation of chromatin silencing at telomere                    | 2.31E-04 |
| GO:0045815 | positive regulation of gene expression, epigenetic                        | 2.55E-04 |
| GO:0061187 | regulation of chromatin silencing at rDNA                                 | 3.14E-04 |
| GO:0051252 | regulation of RNA metabolic process                                       | 3.20E-04 |
| GO:0060969 | negative regulation of gene silencing                                     | 3.42E-04 |
| GO:0009966 | regulation of signal transduction                                         | 3.93E-04 |
| GO:0023051 | regulation of signaling                                                   | 3.93E-04 |
| GO:0006325 | chromatin organization                                                    | 7.69E-04 |
| GO:0061186 | negative regulation of chromatin silencing at silent mating-type cassette | 8.72E-04 |
| GO:0048584 | positive regulation of response to stimulus                               | 9.98E-04 |

**Table S3: qPCR validation of PDR transcriptional regulators**

| Drug         | Gene deleted    | Systematic name                                              | Brief Description                                                   | PDR5         |              | SNQ2         |              | YORI         |               | Screen Result |
|--------------|-----------------|--------------------------------------------------------------|---------------------------------------------------------------------|--------------|--------------|--------------|--------------|--------------|---------------|---------------|
|              |                 |                                                              |                                                                     | fc           | p            | fc           | p            | fc           | p             |               |
| <b>1</b>     | <i>hoΔ</i>      | YDL227C                                                      | Site-specific endonuclease                                          | 15.61        |              | 6.90         |              | 5.68         |               |               |
|              | <i>pdr1Δ</i>    | YGL013C                                                      | Transcription factor that regulates the pleiotropic drug response   | 1.40         | <b>0.000</b> | 1.91         | <b>0.001</b> | 1.17         | <b>0.000</b>  | Upregulator   |
|              | <i>nbp2Δ</i>    | YDR162C                                                      | Protein involved in the HOG (high osmolarity glycerol) pathway      | 8.91         | <b>0.012</b> | 6.03         | 0.152        | 4.38         | 0.095         | Upregulator   |
|              | <i>cho2Δ</i>    | YGR157W                                                      | Phosphatidylethanolamine methyltransferase (PEMT)                   | 8.21         | <b>0.005</b> | 4.10         | <b>0.007</b> | 4.98         | 0.138         | Upregulator   |
|              | <i>ypt6Δ</i>    | YLR262C                                                      | Rab family GTPase                                                   | 8.20         | <b>0.037</b> | 4.33         | <b>0.024</b> | 4.00         | 0.069         | Upregulator   |
|              | <i>gyp1Δ</i>    | YOR070C                                                      | Cis-golgi GTPase-activating protein (GAP) for yeast Rabs            | 9.56         | <b>0.021</b> | 4.03         | 0.072        | 3.99         | 0.064         | Upregulator   |
|              | <i>gcn2Δ</i>    | YDR283C                                                      | Protein kinase                                                      | 22.90        | <b>0.025</b> | 11.94        | <b>0.005</b> | 8.26         | <b>0.015</b>  | Downregulator |
|              | <i>mad1Δ</i>    | YGL086W                                                      | Coiled-coil protein involved in spindle-assembly checkpoint         | 22.46        | 0.123        | 11.83        | <b>0.022</b> | 9.85         | <b>0.014</b>  | Downregulator |
|              | <i>fyv10Δ</i>   | YIL097W                                                      | Subunit of GID complex                                              | 17.98        | 0.148        | 11.64        | <b>0.005</b> | 6.05         | 0.324         | Downregulator |
|              | <i>sap30Δ</i>   | YMR263W                                                      | Component of Rpd3L histone deacetylase complex                      | 18.07        | 0.144        | 12.20        | <b>0.005</b> | 8.45         | <b>0.013</b>  | Downregulator |
| <i>tom7Δ</i> | YNL070W         | Component of the TOM (translocase of outer membrane) complex | 22.65                                                               | <b>0.023</b> | 13.77        | <b>0.002</b> | 9.00         | <b>0.009</b> | Downregulator |               |
| <b>2</b>     | <i>hoΔ</i>      | YDL227C                                                      | Site-specific endonuclease                                          | 1.52         |              | 36.15        |              | 26.59        |               |               |
|              | <i>pdr1Δ</i>    | YGL013C                                                      | Transcription factor that regulates the pleiotropic drug response   | 1.37         | 0.381        | 20.14        | <b>0.021</b> | 23.76        | 0.303         | Upregulator   |
|              | <i>yrr1Δ</i>    | YOR162C                                                      | Zn2-Cys6 zinc-finger transcription factor                           | 2.72         | 0.092        | 11.87        | <b>0.002</b> | 15.10        | <b>0.041</b>  | Upregulator   |
|              | <i>ssn2Δ</i>    | YDR443C                                                      | Subunit of the RNA polymerase II mediator complex                   | 2.91         | 0.073        | 20.28        | <b>0.014</b> | 15.79        | <b>0.032</b>  | Upregulator   |
|              | <i>met1Δ</i>    | YKR069W                                                      | S-adenosyl-L-methionine uroporphyrinogen III transmethylase         | 1.46         | 0.454        | 21.07        | <b>0.016</b> | 10.58        | <b>0.006</b>  | Upregulator   |
|              | <i>met8Δ</i>    | YBR213W                                                      | Bifunctional dehydrogenase and ferrochelatase                       | 1.61         | 0.438        | 18.22        | <b>0.010</b> | 9.42         | <b>0.006</b>  | Upregulator   |
|              | <i>cho2Δ</i>    | YGR157W                                                      | Phosphatidylethanolamine methyltransferase (PEMT)                   | 1.66         | 0.412        | 20.42        | <b>0.046</b> | 14.92        | <b>0.026</b>  | Upregulator   |
|              | <i>spf1Δ</i>    | YEL031W                                                      | P-type ATPase, ion transporter of the ER membrane                   | 3.29         | 0.051        | 73.58        | <b>0.016</b> | 45.53        | <b>0.033</b>  | Downregulator |
|              | <i>alg6Δ</i>    | YOR002W                                                      | Alpha 1,3 glucosyltransferase                                       | 2.98         | 0.070        | 62.82        | <b>0.048</b> | 32.90        | 0.211         | Downregulator |
| <i>mad2Δ</i> | YJL030W         | Component of the spindle-assembly checkpoint complex         | 2.46                                                                | 0.119        | 56.78        | <b>0.026</b> | 30.75        | 0.233        | Downregulator |               |
| <b>3</b>     | <i>hoΔ</i>      | YDL227C                                                      | Site-specific endonuclease                                          | 9.53         |              | 3.27         |              | 4.04         |               |               |
|              | <i>pdr1Δ</i>    | YGL013C                                                      | Transcription factor that regulates the pleiotropic drug response   | 1.83         | <b>0.000</b> | 1.42         | <b>0.000</b> | 1.46         | <b>0.000</b>  | Upregulator   |
|              | <i>uga2Δ</i>    | YBR006W                                                      | Succinate semialdehyde dehydrogenase                                | 8.31         | 0.079        | 2.69         | <b>0.008</b> | 3.29         | <b>0.027</b>  | Upregulator   |
|              | <i>cho2Δ</i>    | YGR157W                                                      | Phosphatidylethanolamine methyltransferase (PEMT)                   | 5.70         | <b>0.001</b> | 3.75         | 0.056        | 4.58         | 0.141         | Upregulator   |
|              | <i>ykl053wΔ</i> | YLK053W                                                      | Dubious ORF                                                         | 8.38         | <b>0.021</b> | 3.37         | 0.314        | 4.44         | 0.238         | Downregulator |
|              | <i>dph1Δ</i>    | YIL103W                                                      | Protein required for synthesis of diphthamide                       | 14.73        | <b>0.005</b> | 3.81         | 0.205        | 6.80         | 0.052         | Downregulator |
|              | <i>stf2Δ</i>    | YBR103W                                                      | WD40 repeat-containing subunit of Set3C histone deacetylase complex | 10.28        | 0.261        | 6.05         | <b>0.000</b> | 6.45         | <b>0.001</b>  | Downregulator |



**Table S4: qPCR on *mad*Δ strains**

| Drug | [Drug](μM) | Strain        | PDR5  |              | SNQ2 |              | YOR1  |              |
|------|------------|---------------|-------|--------------|------|--------------|-------|--------------|
|      |            |               | FC    | P            | FC   | P            | FC    | P            |
| 5    | 50         | <i>ho</i> Δ   | 22.81 |              | 1.80 |              | 22.36 |              |
|      |            | <i>mad1</i> Δ | 37.83 | <b>0.014</b> | 2.94 | <b>0.001</b> | 46.05 | <b>0.033</b> |
|      |            | <i>mad2</i> Δ | 34.27 | 0.058        | 2.41 | <b>0.022</b> | 43.01 | <b>0.041</b> |
|      |            | <i>mad3</i> Δ | 26.60 | 0.083        | 2.57 | <b>0.009</b> | 36.52 | 0.068        |
| 6    | 10         | <i>ho</i> Δ   | 2.51  |              | 1.24 |              | 3.26  |              |
|      |            | <i>mad1</i> Δ | 3.94  | <b>0.019</b> | 1.40 | 0.220        | 6.71  | <b>0.001</b> |
|      |            | <i>mad2</i> Δ | 4.29  | <b>0.007</b> | 1.21 | 0.449        | 7.08  | <b>0.001</b> |
|      |            | <i>mad3</i> Δ | 4.06  | <b>0.010</b> | 0.97 | 0.087        | 6.41  | <b>0.007</b> |
| 7    | 50         | <i>ho</i> Δ   | 1.01  |              | 2.88 |              | 0.91  |              |
|      |            | <i>mad1</i> Δ | 1.28  | 0.079        | 4.90 | <b>0.002</b> | 1.26  | <b>0.010</b> |
|      |            | <i>mad2</i> Δ | 0.93  | 0.127        | 5.70 | <b>0.003</b> | 0.84  | 0.268        |
|      |            | <i>mad3</i> Δ | 1.17  | <b>0.005</b> | 3.74 | <b>0.000</b> | 1.17  | <b>0.001</b> |
| 8    | 50         | <i>ho</i> Δ   | 3.11  |              | 1.70 |              | 2.03  |              |
|      |            | <i>mad1</i> Δ | 6.09  | <b>0.001</b> | 1.67 | 0.446        | 4.46  | <b>0.004</b> |
|      |            | <i>mad2</i> Δ | 5.98  | <b>0.003</b> | 1.83 | 0.325        | 4.43  | <b>0.003</b> |
|      |            | <i>mad3</i> Δ | 5.10  | 0.094        | 1.97 | 0.195        | 4.02  | <b>0.014</b> |
| 9    | 25         | <i>ho</i> Δ   | 1.46  |              | 0.95 |              | 3.15  |              |
|      |            | <i>mad1</i> Δ | 2.22  | <b>0.025</b> | 0.98 | 0.357        | 5.75  | <b>0.009</b> |
|      |            | <i>mad2</i> Δ | 1.79  | 0.153        | 1.05 | 0.297        | 5.01  | <b>0.001</b> |
|      |            | <i>mad3</i> Δ | 1.47  | 0.469        | 0.97 | 0.414        | 4.07  | <b>0.019</b> |

**Table S5:** Description of all genes tested in qPCR experiments\*

| Gene         | Systematic Name | Gene name                        | Brief Description                                                 | Description                                                                                                                                                                                                                                                                                                                                                                                            |
|--------------|-----------------|----------------------------------|-------------------------------------------------------------------|--------------------------------------------------------------------------------------------------------------------------------------------------------------------------------------------------------------------------------------------------------------------------------------------------------------------------------------------------------------------------------------------------------|
| <i>ho1</i>   | YDL227C         | HOthollic switching endonuclease | Site-specific endonuclease                                        | Site-specific endonuclease; required for gene conversion at the MAT locus (homothallic switching) through the generation of a ds DNA break; expression restricted to mother cells in late G1 as controlled by Swi4p-Swi6p, Swi5p, and Ash1p                                                                                                                                                            |
| <i>pdr1Δ</i> | YGL013C         | Pleiotropic Drug Resistance      | Transcription factor that regulates the pleiotropic drug response | Transcription factor that regulates the pleiotropic drug response; zinc cluster protein that is a master regulator involved in recruiting other zinc cluster proteins to pleiotropic drug response elements (PDREs) to fine tune the regulation of multidrug resistance genes; relocates to the cytosol in response to hypoxia; PDR1 has a paralog, PDR3, that arose from the whole genome duplication |
| <i>yrr1Δ</i> | YOR162C         | Yeast Reveromycin-A Resistant    | Zn2-Cys6 zinc-finger transcription factor                         | Zn2-Cys6 zinc-finger transcription factor; activates genes involved in multidrug resistance; paralog of Yrm1p, acting on an overlapping set of target genes; YRR1 has a paralog, PDR8, that arose from the whole genome duplication                                                                                                                                                                    |
| <i>ssn2Δ</i> | YDR443C         | Suppressor of SNf1               | Subunit of the RNA polymerase II mediator complex                 | Subunit of the RNA polymerase II mediator complex; associates with core polymerase subunits to form the RNA polymerase II holoenzyme; required for stable association of Srb10p-Srb11p kinase; essential for transcriptional regulation                                                                                                                                                                |

|              |         |                                             |                                                             |                                                                                                                                                                                                                                                                                                                                                                                               |
|--------------|---------|---------------------------------------------|-------------------------------------------------------------|-----------------------------------------------------------------------------------------------------------------------------------------------------------------------------------------------------------------------------------------------------------------------------------------------------------------------------------------------------------------------------------------------|
| <i>met1Δ</i> | YKR069W | METHionine requiring                        | S-adenosyl-L-methionine uroporphyrinogen III transmethylase | S-adenosyl-L-methionine uroporphyrinogen III transmethylase; involved in the biosynthesis of siroheme, a prosthetic group used by sulfite reductase; required for sulfate assimilation and methionine biosynthesis                                                                                                                                                                            |
| <i>met8Δ</i> | YBR213W | METHionine requiring                        | Bifunctional dehydrogenase and ferrochelatase               | Bifunctional dehydrogenase and ferrochelatase; involved in the biosynthesis of siroheme, a prosthetic group used by sulfite reductase; required for sulfate assimilation and methionine biosynthesis                                                                                                                                                                                          |
| <i>cho2Δ</i> | YGR157W | CHoline requiring                           | Phosphatidylethanolamine methyltransferase (PEMT)           | Phosphatidylethanolamine methyltransferase (PEMT); catalyzes the first step in the conversion of phosphatidylethanolamine to phosphatidylcholine during the methylation pathway of phosphatidylcholine biosynthesis                                                                                                                                                                           |
| <i>spf1Δ</i> | YEL031W | Sensitivity to Pichia Farinosa killer toxin | P-type ATPase, ion transporter of the ER membrane           | P-type ATPase, ion transporter of the ER membrane; required to maintain normal lipid composition of intracellular compartments and proper targeting of mitochondrial outer membrane tail-anchored proteins; involved in ER function and Ca <sup>2+</sup> homeostasis; required for regulating Hmg2p degradation; confers sensitivity to a killer toxin (SMKT) produced by Pichia farinosa KK1 |

|              |         |                                 |                                                                |                                                                                                                                                                                                                                                                                                                                                                    |
|--------------|---------|---------------------------------|----------------------------------------------------------------|--------------------------------------------------------------------------------------------------------------------------------------------------------------------------------------------------------------------------------------------------------------------------------------------------------------------------------------------------------------------|
| <i>alg6Δ</i> | YOR002W | Asparagine-Linked Glycosylation | Alpha 1,3 glucosyltransferase                                  | Alpha 1,3 glucosyltransferase; involved in transfer of oligosaccharides from dolichyl pyrophosphate to asparagine residues of proteins during N-linked protein glycosylation; C998T transition in human ortholog ALG6 causes carbohydrate-deficient glycoprotein syndrome type-Ic; wild-type human ortholog ALG6 can partially complement yeast <i>alg6</i> mutant |
| <i>mad2Δ</i> | YJL030W | Mitotic Arrest-Deficient        | Component of the spindle-assembly checkpoint complex           | Component of the spindle-assembly checkpoint complex; delays onset of anaphase in cells with defects in mitotic spindle assembly; forms a complex with Mad1p; regulates APC/C activity during prometaphase and metaphase of meiosis I; gene dosage imbalance between MAD1 and MAD2 leads to chromosome instability                                                 |
| <i>nbp2Δ</i> | YDR162C | Nap1 Binding Protein            | Protein involved in the HOG (high osmolarity glycerol) pathway | Protein involved in the HOG (high osmolarity glycerol) pathway; negatively regulates Hog1p by recruitment of phosphatase Ptc1p the Pbs2p-Hog1p complex; interacts with Bck1p and down regulates the cell wall integrity pathway; found in the nucleus and cytoplasm, contains an SH3 domain and a Ptc1p binding domain (PBM)                                       |

|              |         |                                     |                                                          |                                                                                                                                                                                                                                                                                                                                                                                                                                                          |
|--------------|---------|-------------------------------------|----------------------------------------------------------|----------------------------------------------------------------------------------------------------------------------------------------------------------------------------------------------------------------------------------------------------------------------------------------------------------------------------------------------------------------------------------------------------------------------------------------------------------|
| <i>ypt6Δ</i> | YLR262C | Yeast Protein Two                   | Rab family GTPase                                        | Rab family GTPase; Ras-like GTP binding protein involved in the secretory pathway, required for fusion of endosome-derived vesicles with the late Golgi, maturation of the vacuolar carboxypeptidase Y; resides temporarily at the Golgi, dissociates into cytosol upon arrival of the Rab GTPase Ypt32p, which also functions in the late Golgi; Golgi-localized form is bound to GTP, while cytosolic form is GDP-bound; homolog of the mammalian Rab6 |
| <i>gyp1Δ</i> | YOR070C | Gtpase-activating protein for YPt1p | Cis-golgi GTPase-activating protein (GAP) for yeast Rabs | Cis-golgi GTPase-activating protein (GAP) for yeast Rabs; the Rab family members are Ypt1p (in vivo) and for Ypt1p, Sec4p, Ypt7p, and Ypt51p (in vitro); involved in vesicle docking and fusion                                                                                                                                                                                                                                                          |
| <i>gcn2Δ</i> | YDR283C | General Control Nonderepressible    | Protein kinase                                           | Protein kinase; phosphorylates the alpha-subunit of translation initiation factor eIF2 (Sui2p) in response to starvation; activated by uncharged tRNAs and the Gcn1p-Gcn20p complex; contributes to DNA damage checkpoint control                                                                                                                                                                                                                        |

|               |         |                                       |                                                             |                                                                                                                                                                                                                                                                                                                                                                                                                                    |
|---------------|---------|---------------------------------------|-------------------------------------------------------------|------------------------------------------------------------------------------------------------------------------------------------------------------------------------------------------------------------------------------------------------------------------------------------------------------------------------------------------------------------------------------------------------------------------------------------|
| <i>mad1Δ</i>  | YGL086W | Mitotic Arrest-Deficient              | Coiled-coil protein involved in spindle-assembly checkpoint | Coiled-coil protein involved in spindle-assembly checkpoint; required for inhibition of karyopherin/importin Pse1p (aka Kap121p) upon spindle assembly checkpoint arrest; phosphorylated by Mps1p upon checkpoint activation which leads to inhibition of anaphase promoting complex activity; forms a complex with Mad2p; gene dosage imbalance between MAD1 and MAD2 leads to chromosome instability                             |
| <i>fyv10Δ</i> | YIL097W | Function required for Yeast Viability | Subunit of GID complex                                      | Subunit of GID complex; involved in proteasome-dependent catabolite inactivation of gluconeogenic enzymes FBPase, PEPCK, and c-MDH; forms dimer with Rmd5p that is then recruited to GID Complex by Gid8p; contains a degenerate RING finger motif needed for GID complex ubiquitin ligase activity in vivo, as well as CTLH and CRA domains; plays role in anti-apoptosis; required for survival upon exposure to K1 killer toxin |
| <i>sap30Δ</i> | YMR263W | Sin3-Associated Polypeptide           | Component of Rpd3L histone deacetylase complex              | Component of Rpd3L histone deacetylase complex; involved in silencing at telomeres, rDNA, and silent mating-type loci; involved in telomere maintenance                                                                                                                                                                                                                                                                            |

|                 |         |                                                 |                                                                     |                                                                                                                                                                                                                                                 |
|-----------------|---------|-------------------------------------------------|---------------------------------------------------------------------|-------------------------------------------------------------------------------------------------------------------------------------------------------------------------------------------------------------------------------------------------|
| <i>tom7Δ</i>    | YNL070W | Translocase of the Outer Mitochondrial membrane | Component of the TOM (translocase of outer membrane) complex        | Component of the TOM (translocase of outer membrane) complex; responsible for recognition and initial import steps for all mitochondrially directed proteins; promotes assembly and stability of the TOM complex                                |
| <i>uga2Δ</i>    | YBR006W | Utilization of GABA                             | Succinate semialdehyde dehydrogenase                                | Succinate semialdehyde dehydrogenase; involved in the utilization of gamma-aminobutyrate (GABA) as a nitrogen source; part of the 4-aminobutyrate and glutamate degradation pathways; localized to the cytoplasm                                |
| <i>yk1053wΔ</i> | YLK053W |                                                 | Dubious ORF                                                         |                                                                                                                                                                                                                                                 |
| <i>dph1Δ</i>    | YIL103W | DiPHthamide biosynthesis                        | Protein required for synthesis of diphthamide                       | Protein required for synthesis of diphthamide; required along with Dph2p, Kti11p, Jjj3p, and Dph5p; diphthamide is a modified histidine residue of translation elongation factor 2 (Eft1p or Eft2p); may act in a complex with Dph2p and Kti11p |
| <i>sif2Δ</i>    | YBR103W | Sir4p-Interacting Factor                        | WD40 repeat-containing subunit of Set3C histone deacetylase complex | WD40 repeat-containing subunit of Set3C histone deacetylase complex; complex represses early/middle sporulation genes; antagonizes telomeric silencing; binds specifically to the Sir4p N-terminus                                              |

\*: All descriptions are directly adapted from Saccharomyces Genome Database (1).

**Table S6:** Plasmids used in this study

| Name  | Description                                                   |
|-------|---------------------------------------------------------------|
| pCH81 | pRS25_ <i>P<sub>PDR5</sub></i> -HIS3- <i>T<sub>CYC1</sub></i> |
| pCH82 | pRS25_ <i>P<sub>SNQ2</sub></i> -HIS3- <i>T<sub>CYC1</sub></i> |
| pCH83 | pRS25_ <i>P<sub>YOR1</sub></i> -HIS3- <i>T<sub>CYC1</sub></i> |

**Table S7:** Strains used in this study

| Strain       | Description                                                                                                                                                                                                                                                                                                                                                                                        | Source                        | Notes                                                                  |
|--------------|----------------------------------------------------------------------------------------------------------------------------------------------------------------------------------------------------------------------------------------------------------------------------------------------------------------------------------------------------------------------------------------------------|-------------------------------|------------------------------------------------------------------------|
| <b>JLY30</b> | <i>MAT<math>\alpha</math>/his3<math>\Delta</math>1/his3<math>\Delta</math>1 leu2<math>\Delta</math>0/leu2<math>\Delta</math>0<br/>LYS2/lys2<math>\Delta</math>0 met15<math>\Delta</math>0/MET15<br/>ura3<math>\Delta</math>0/ura3<math>\Delta</math>0<br/><math>\Delta</math>ho::KanMX4/<math>\Delta</math>ho::KanMX4</i>                                                                          | Yeast deletion collection (2) | Aka <i>ho<math>\Delta</math></i> ; <i>ho<math>\Delta</math></i> BY4743 |
| <b>JLY31</b> | JLY30 transformed with pCH81                                                                                                                                                                                                                                                                                                                                                                       | This study                    |                                                                        |
| <b>JLY32</b> | JLY30 transformed with pCH82                                                                                                                                                                                                                                                                                                                                                                       | This study                    |                                                                        |
| <b>JLY33</b> | JLY30 transformed with pCH83                                                                                                                                                                                                                                                                                                                                                                       | This study                    |                                                                        |
| <b>JLY34</b> | <i>MAT<math>\alpha</math>, pdr1-3, ura3, his1, <math>\Delta</math>yor1::hisG,<br/><math>\Delta</math>snq2::hisG, pdr5-<math>\Delta</math>2::hisG, <math>\Delta</math>pdr10::hisG,<br/><math>\Delta</math>pdr11::hisG, <math>\Delta</math>ycf1::hisG, pdr3-<math>\Delta</math>2::hisG,<br/><math>\Delta</math>pdr15::hisG, pdr1-<math>\Delta</math>3::hisG, <math>\Delta</math>ho::KanMX4</i>       | This study                    | Aka <i>ho<math>\Delta</math></i> AD1-9                                 |
| <b>JLY35</b> | <i>MAT<math>\alpha</math>, pdr1-3, ura3, his1, <math>\Delta</math>yor1::hisG,<br/><math>\Delta</math>snq2::hisG, pdr5-<math>\Delta</math>2::hisG, <math>\Delta</math>pdr10::hisG,<br/><math>\Delta</math>pdr11::hisG, <math>\Delta</math>ycf1::hisG, pdr3-<math>\Delta</math>2::hisG,<br/><math>\Delta</math>pdr15::hisG, pdr1-<math>\Delta</math>3::hisG,<br/><math>\Delta</math>mad1::KanMX4</i> | This study                    | Aka <i>mad1<math>\Delta</math></i> AD1-9                               |
| <b>JLY36</b> | <i>MAT<math>\alpha</math>, pdr1-3, ura3, his1, <math>\Delta</math>yor1::hisG,<br/><math>\Delta</math>snq2::hisG, pdr5-<math>\Delta</math>2::hisG, <math>\Delta</math>pdr10::hisG,<br/><math>\Delta</math>pdr11::hisG, <math>\Delta</math>ycf1::hisG, pdr3-<math>\Delta</math>2::hisG,<br/><math>\Delta</math>pdr15::hisG, pdr1-<math>\Delta</math>3::hisG,<br/><math>\Delta</math>mad2::KanMX4</i> | This study                    | Aka <i>mad2<math>\Delta</math></i> AD1-9                               |
| <b>JLY37</b> | <i>MAT<math>\alpha</math>, pdr1-3, ura3, his1, <math>\Delta</math>yor1::hisG,<br/><math>\Delta</math>snq2::hisG, pdr5-<math>\Delta</math>2::hisG, <math>\Delta</math>pdr10::hisG,<br/><math>\Delta</math>pdr11::hisG, <math>\Delta</math>ycf1::hisG, pdr3-<math>\Delta</math>2::hisG,<br/><math>\Delta</math>pdr15::hisG, pdr1-<math>\Delta</math>3::hisG,<br/><math>\Delta</math>mad3::KanMX4</i> | This study                    | Aka <i>mad3<math>\Delta</math></i> AD1-9                               |

All other deletions strains used in this study is retrieved from the yeast deletion collection.



**Supplementary Datasets:**

**Dataset 1. Z-scores for each drug under with each biosensor construct in MSNP collection.**

**Dataset 2. Identity, fold change and significance of all samples that pass significance threshold in screenings**

## Reference

1. Cherry JM, *et al.* (2012) Saccharomyces Genome Database: the genomics resource of budding yeast. *Nucleic acids research* 40(Database issue):D700-705.
2. Giaever G, *et al.* (2002) Functional profiling of the Saccharomyces cerevisiae genome. *Nature* 418(6896):387-391.
